# Supplementary material for: Covidogram as a simple tool for predicting severe course of COVID-19: population-based study
Source: PubMed Central journal article supplement — BMJ Open. 2021 Feb 23;11(2):e045442. doi: 10.1136/bmjopen-2020-045442 (PMC7907625; doi:10.1136/bmjopen-2020-045442), 2021-02-23

**Table S1.** Univariable logistic regression models

|                                            | Regression coefficients | SE    | OR (95% CI)             | P-value |
|--------------------------------------------|-------------------------|-------|-------------------------|---------|
| <b>Basic characteristics</b>               |                         |       |                         |         |
| Sex – men (ref. women)                     | 0.395                   | 0.096 | 1.48 (1.23; 1.79)       | < 0.001 |
| Age 40–49 years (ref. < 40 years)          | 1.260                   | 0.464 | 3.52 (1.42; 8.75)       | 0.007   |
| Age 50–59 years (ref. < 40 years)          | 2.553                   | 0.413 | 12.84 (5.72; 28.85)     | < 0.001 |
| Age 60–69 years (ref. < 40 years)          | 3.716                   | 0.396 | 41.09 (18.93; 89.20)    | < 0.001 |
| Age 70–79 years (ref. < 40 years)          | 4.584                   | 0.391 | 97.92 (45.52; 210.66)   | < 0.001 |
| Age 80–89 years (ref. < 40 years)          | 5.096                   | 0.392 | 163.44 (75.80; 352.40)  | < 0.001 |
| Age 90+ years (ref. < 40 years)            | 5.555                   | 0.418 | 258.59 (113.92; 586.98) | < 0.001 |
| <b>History</b>                             |                         |       |                         |         |
| Hypertension                               | 1.729                   | 0.098 | 5.64 (4.65; 6.83)       | < 0.001 |
| Atrial fibrillation                        | 1.990                   | 0.147 | 7.32 (5.48; 9.76)       | < 0.001 |
| History of stroke                          | 1.949                   | 0.169 | 7.02 (5.05; 9.77)       | < 0.001 |
| History of MI or PCI                       | 1.569                   | 0.208 | 4.80 (3.19; 7.21)       | < 0.001 |
| Chronic heart failure                      | 2.346                   | 0.142 | 10.45 (7.90; 13.81)     | < 0.001 |
| Chronic kidney disease                     | 2.143                   | 0.133 | 8.52 (6.57; 11.06)      | < 0.001 |
| Diabetes mellitus                          | 1.544                   | 0.114 | 4.68 (3.75; 5.85)       | < 0.001 |
| Chronic obstructive pulmonary disease      | 1.020                   | 0.119 | 2.77 (2.19; 3.51)       | < 0.001 |
| Acid-related disorders                     | 1.562                   | 0.099 | 4.77 (3.93; 5.80)       | < 0.001 |
| Recent history of cancer ( $\leq$ 5 years) | 1.536                   | 0.171 | 4.65 (3.32; 6.50)       | < 0.001 |
| Rheumatoid arthritis                       | 1.052                   | 0.295 | 2.86 (1.60; 5.10)       | < 0.001 |
| <b>Treatment</b>                           |                         |       |                         |         |
| ACE inhibitors                             | 1.412                   | 0.101 | 4.10 (3.37; 5.00)       | < 0.001 |
| ARBs                                       | 0.977                   | 0.128 | 2.66 (2.07; 3.41)       | < 0.001 |
| Calcium channel blockers                   | 1.350                   | 0.114 | 3.86 (3.08; 4.83)       | < 0.001 |
| Beta-blockers                              | 1.756                   | 0.100 | 5.79 (4.76; 7.04)       | < 0.001 |
| Diuretics                                  | 1.867                   | 0.100 | 6.47 (5.31; 7.87)       | < 0.001 |
| Anticoagulants / antithrombotic agents     | 1.747                   | 0.111 | 5.74 (4.62; 7.13)       | < 0.001 |
| Statins                                    | 1.375                   | 0.103 | 3.95 (3.23; 4.84)       | < 0.001 |



**Table S2.** Characteristics of COVID-19 patients in comparison to general population of the Czech Republic

|                                            | COVID-19 patients<br>N = 7,455 | General<br>population<br>N = 10.6 million | P-value |
|--------------------------------------------|--------------------------------|-------------------------------------------|---------|
| <b>Basic characteristics</b>               |                                |                                           |         |
| Men                                        | 46.7%                          | 49.1%                                     | < 0.001 |
| Age, mean $\pm$ SD                         | 47.2 $\pm$ 21.1                | 42.5 $\pm$ 23.1                           | < 0.001 |
| <b>Medical history</b>                     |                                |                                           |         |
| Hypertension                               | 20.4%                          | 17.5%                                     | < 0.001 |
| Atrial fibrillation                        | 3.4%                           | 2.3%                                      | < 0.001 |
| History of stroke                          | 2.5%                           | 1.4%                                      | < 0.001 |
| History of MI or PCI                       | 1.9%                           | 1.5%                                      | 0.011   |
| Chronic heart failure                      | 3.3%                           | 1.6%                                      | < 0.001 |
| Chronic kidney disease                     | 4.2%                           | 2.4%                                      | < 0.001 |
| Diabetes mellitus                          | 8.7%                           | 7.2%                                      | < 0.001 |
| Chronic obstructive pulmonary disease      | 10.0%                          | 8.4%                                      | < 0.001 |
| Acid-related disorders                     | 16.2%                          | 11.7%                                     | < 0.001 |
| Recent history of cancer ( $\leq$ 5 years) | 2.9%                           | 2.1%                                      | < 0.001 |
| Rheumatoid arthritis                       | 1.2%                           | 0.9%                                      | 0.003   |
| <b>Treatment</b>                           |                                |                                           |         |
| ACE inhibitors                             | 15.1%                          | 14.5%                                     | 0.100   |
| ARBs                                       | 8.4%                           | 7.6%                                      | 0.009   |
| Calcium channel blockers                   | 9.5%                           | 8.8%                                      | 0.066   |
| Beta-blockers                              | 14.7%                          | 12.0%                                     | < 0.001 |
| Diuretics                                  | 13.8%                          | 11.6%                                     | < 0.001 |
| Anticoagulants / antithrombotic agents     | 8.7%                           | 6.1%                                      | < 0.001 |
| Statins                                    | 14.1%                          | 13.9%                                     | 0.701   |

P-value of binomial test (categorical variables) and P-value of one-sample t-test (continuous variables).

ACE = angiotensin converting enzyme, ARB = angiotensin II receptor blockers, MI = myocardial infarction, PCI = percutaneous coronary intervention

**Table S3.** Characteristics of COVID-19 patients by using drugs for acid-related disorders

|                                            | Using drugs<br>N = 1,205 | Not using drugs<br>N = 6,250 | P-value           |
|--------------------------------------------|--------------------------|------------------------------|-------------------|
| <b>Basic characteristics</b>               |                          |                              |                   |
| Men                                        | 524 (43.5%)              | 2 957 (47.3%)                | <b>0.015</b>      |
| Age, mean $\pm$ SD                         | 62.6 $\pm$ 18.3          | 44.2 $\pm$ 20.2              | <b>&lt; 0.001</b> |
| <b>Medical history</b>                     |                          |                              |                   |
| Hypertension                               | 542 (45.0%)              | 982 (15.7%)                  | <b>&lt; 0.001</b> |
| Atrial fibrillation                        | 125 (10.4%)              | 129 (2.1%)                   | <b>&lt; 0.001</b> |
| History of stroke                          | 91 (7.6%)                | 95 (1.5%)                    | <b>&lt; 0.001</b> |
| History of MI or PCI                       | 69 (5.7%)                | 69 (1.1%)                    | <b>&lt; 0.001</b> |
| Chronic heart failure                      | 138 (11.5%)              | 109 (1.7%)                   | <b>&lt; 0.001</b> |
| Chronic kidney disease                     | 158 (13.1%)              | 156 (2.5%)                   | <b>&lt; 0.001</b> |
| Diabetes mellitus                          | 222 (18.4%)              | 424 (6.8%)                   | <b>&lt; 0.001</b> |
| Chronic obstructive pulmonary disease      | 271 (22.5%)              | 474 (7.6%)                   | <b>&lt; 0.001</b> |
| Recent history of cancer ( $\leq$ 5 years) | 93 (7.7%)                | 124 (2.0%)                   | <b>&lt; 0.001</b> |
| Rheumatoid arthritis                       | 39 (3.2%)                | 50 (0.8%)                    | <b>&lt; 0.001</b> |
| <b>Treatment</b>                           |                          |                              |                   |
| ACE inhibitors                             | 348 (28.9%)              | 781 (12.5%)                  | <b>&lt; 0.001</b> |
| ARBs                                       | 217 (18.0%)              | 411 (6.6%)                   | <b>&lt; 0.001</b> |
| Calcium channel blockers                   | 253 (21.0%)              | 452 (7.2%)                   | <b>&lt; 0.001</b> |
| Beta-blockers                              | 422 (35.0%)              | 674 (10.8%)                  | <b>&lt; 0.001</b> |
| Diuretics                                  | 399 (33.1%)              | 629 (10.1%)                  | <b>&lt; 0.001</b> |
| Anticoagulants / antithrombotic agents     | 270 (22.4%)              | 375 (6.0%)                   | <b>&lt; 0.001</b> |
| Statins                                    | 369 (30.6%)              | 682 (10.9%)                  | <b>&lt; 0.001</b> |

P-value of Fisher's exact test (categorical variables) and P-value of Mann-Whitney U test (continuous variables).

ACE = angiotensin-converting enzyme, ARBs = angiotensin II receptor blockers, MI = myocardial infarction,

PCI = percutaneous coronary intervention

**Figure S1.** Time to analysed endpoint (severe condition)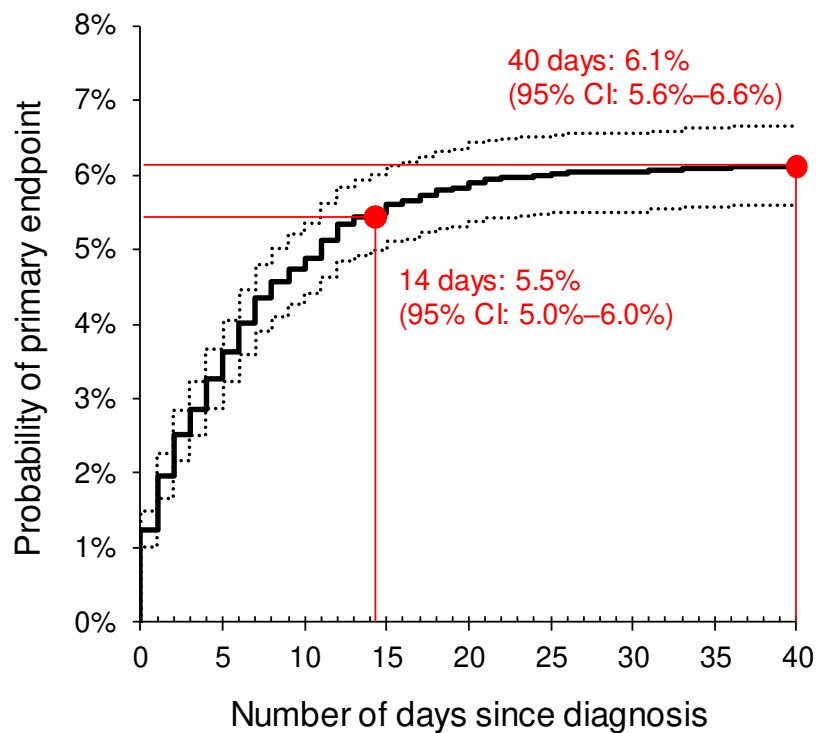**Figure S2.** Calibration curves of the multivariable logistic regression model (A) and its simplified version (B)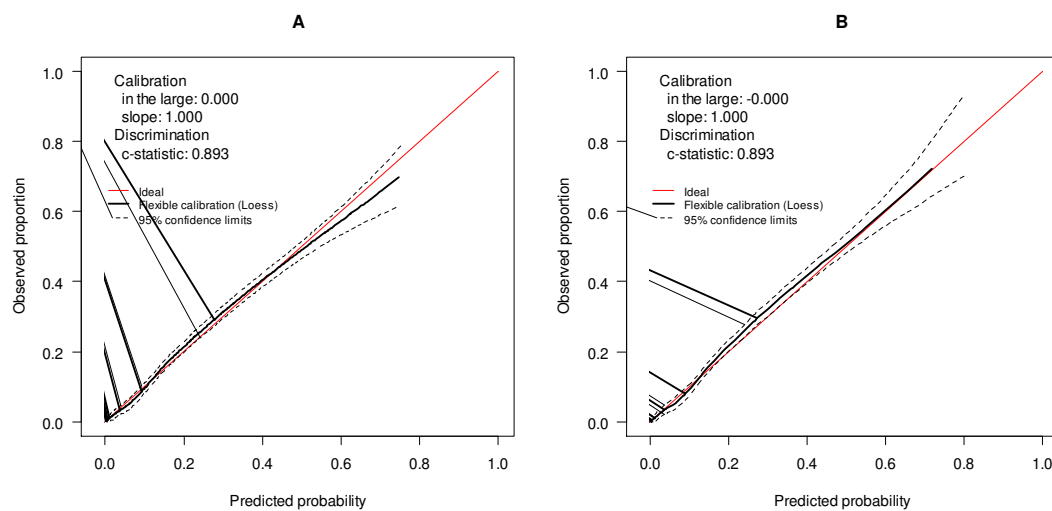

Supplement: bmjopen-2020-045442supp001.pdf [file bmjopen-2020-045442supp001.pdf]
